# Supplementary material for: Clinical usefulness of the “GeneSoC® SARS-CoV-2 N2 Detection Kit”
Source: publisher site journal article supplement (doi:10.1515/labmed-2023-0119), 2024-02-28
Supplement: Supplementary file 1 [file j_labmed-2023-0119_suppl_001.pdf]

## Supplementary Methods

### 1) GeneSoC® SARS-CoV-2 N2 Detection Kit (Kyorin Pharmaceutical Co., Ltd., Tokyo, Japan; Kyorin assay)

The Kyorin assay employs primer-probe sets targeting the nucleoprotein (N)-gene of SARS-CoV-2 based on the principle of real-time reverse transcription-polymerase chain reaction (real-time RT-PCR). The procedure was performed in according to the manufacturer's instructions. After adding 5  $\mu$ L of the extracted RNA sample to 15  $\mu$ L of a mixture of PCR Buffer, Enzyme Mix, and Primer/Probe Mix, 19  $\mu$ L was injected into a dedicated GeneSoC® measurement chip (Kyorin Pharmaceutical Co., Ltd., Tokyo, Japan) and measured using GeneSoC® (Kyorin Pharmaceutical Co., Ltd., Tokyo, Japan). The test results were deemed positive when an increase in the amplification curve was observed during the reaction time.

### 2) N2 assay using the Japanese National Institute of Infectious Diseases (NIID) assay

The NIID assay was performed using real-time RT-PCR. The Manual for the Detection of Pathogen 2019-nCoV Ver.2.6 [1] employs primer-probe sets for two regions: the N set and N2 set. Only the N2 set was evaluated in this study because previous analyses have suggested that the detection rate of the N set was low [2]. Real-time RT-PCR was performed using the QuantiTect Probe RT-PCR Kit (QIAGEN, Hilden, Germany) and LightCycler 480 System (Roche, Basel, Switzerland). The procedure was performed in according to the manufacturer's instructions. Cycling conditions were as follows: 30 min at 50 °C, 15 min at 95 °C, and 45 cycles of 15 s at 95 °C and 60 s at 60 °C. The

test results were deemed positive when an increase in the amplification curve was observed with a Ct value of <40 during reaction time. In addition, to measure the viral load of SARS-CoV-2, dilutions of "novel coronavirus positive control RNA" (Nihon Gene Research Laboratories, Inc., Miyagi, Japan) were measured with the samples with the NIID assay, and a calibration curve was generated.

3) Ampdirect™ 2019-nCoV Detection Kit (Shimadzu Corporation, Kyoto, Japan; SHIMADZU assay)

The SHIMADZU assay employs N1 and N2 primer-probe sets targeting the N-gene of SARS-CoV-2 based on the principle of real-time RT-PCR. The procedure was performed in according to the manufacturer's instructions. Briefly, a mixture of the sample (5 µL) and treatment solution (5 µL) was pretreated at 95 °C for 5 min and then added to the PCR solution. Amplification and real-time detection were performed on a LightCycler 480 System (Roche, Basel, Switzerland). Cycling conditions were as follows: 10 min at 42 °C, 1 min at 95 °C, and 45 cycles of 5 s at 95 °C and 15 s at 60 °C. The test results were deemed positive when an increase in the amplification curve was observed during the reaction time.

4) Lumipulse Presto SARS-CoV-2 Ag (Fujirebio Inc., Tokyo, Japan; FUJIREBIO assay)

The FUJIREBIO assay measures antigen levels quantitatively by targeting the N-protein of SARS-CoV-2 based on the principle of chemiluminescent enzyme immunoassay. The procedure was performed in according to the manufacturer's instructions. The samples were separated into other tubes and centrifuged at 2000×g for 5 min and tested using a fully automated Lumipulse® L2400 (Fujirebio Inc., Tokyo, Japan). Lumipulse® L2400 measures the

luminescence intensity emitted from a sample using a two-step sandwich method. The antigen concentration in the sample is calculated by automatically applying the luminescence intensity of the sample to a calibration curve created based on the luminescence intensity obtained from a standard SARS-CoV-2 Ag solution (Fujirebio Inc., Tokyo, Japan). The test results were deemed positive or judgment pending or negative by the antigen concentration in the nasopharyngeal (negative: less than 1.00 pg/mL, judgment pending: from 1.00 to less than 10.00 pg/mL, and positive: over 10.00 pg/mL) and saliva specimens (negative: less than 0.67 pg/mL, judgment pending: from 0.67 to less than 4.00 pg/mL, and positive: over 4.00 pg/mL), respectively. When the result of first test was within the judgment pending level, the sample was tested after re-centrifuged at 2000×g for 5 min. The results of retests were deemed positive when the antigen concentration exceeded 1.34 pg/mL in the nasopharyngeal specimens and 0.67 pg/mL in the saliva specimens.

#### Reference

1. National Institute of Infectious Diseases. Manual for the Detection of Pathogen 2019-nCoV Ver.2.6. 2020;1–16. Available at: <https://www.niid.go.jp/niid/images/epi/corona/2019-nCoVmanual20200217-en.pdf>  
Accessed: 28 November 2023.
2. Shirato K, Nao N, Katano H, Takayama I, Saito S, Kato F, et al. Development of Genetic Diagnostic Methods for Detection for Novel Coronavirus 2019 (nCoV-2019) in Japan. *Jpn J Infect Dis* 2020;73:304–7.

Supplemental Figure

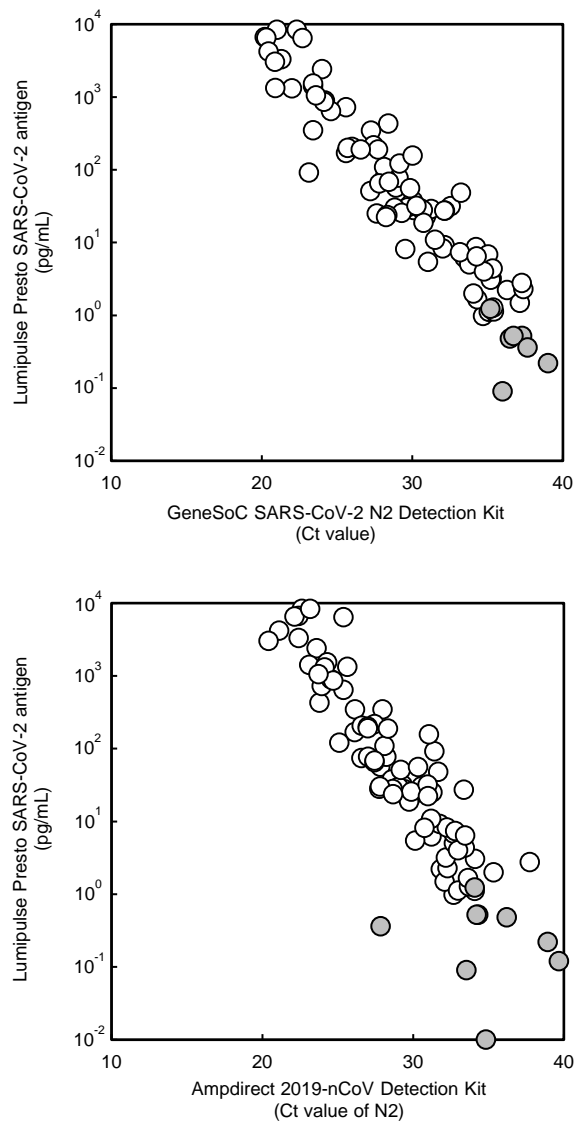

**Supplementary Figure:** Correlation of antigen concentration with Ct values. Gray circles are negative for SARS-CoV-2 antigen.
